# Supplementary material for: Spatio-Temporal Changes in China’s Mainland Shorelines Over 30 Years Using Landsat Time Series Data (1990–2019)
Source: Copernicus journal article supplement (doi:10.5194/essd-2024-123), 2024-05-14
Supplement: Supplementary file 1 [file readme.docx]

| **Field name** | **Description** |
| --- | --- |
| DSAS_BHB-YREZ | BHB-YREZ Shoreline Change Analysis Document |
| DSAS-PREZ | PREZ Shoreline Change Analysis Document |
| DSAS-YRE-HZBZ | YRE-HZBZ Shoreline Change Analysis Document |
| Baselines | Created a 500-m buffer using the 1990 shoreline and simplified and manually edited it to generate a baseline |
| Transect | Perpendicular transects, spaced at intervals of 500 m |
| Transect_intersect | The measurement transects that are cast by DSAS from the baseline intersect the shoreline vectors. The points  of intersection provide location and time information used to calculate rates of change. The distances from the baseline to each intersection point along a transect are used to compute the selected statistics |
| Transect_rates | Shoreline change statistics |
